# Supplementary material
Source: PubMed Central journal article supplement (PMC5621898)
Supplement: jciinsight-2-93265-s001.pdf [file jciinsight-2-93265-s001.pdf]

## Supplementary Figures

### Supplementary Figure 1

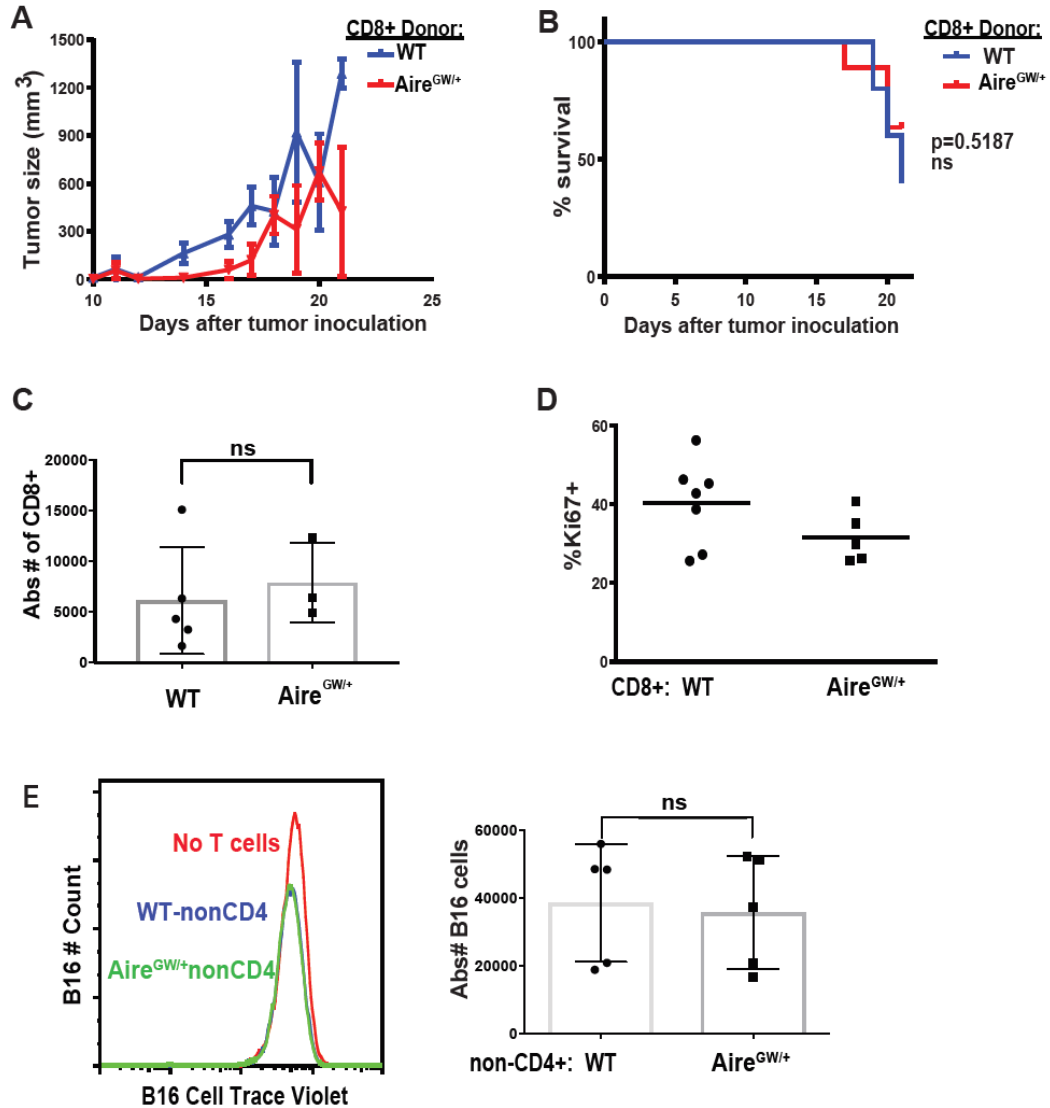

**Supplementary Figure 1: Aire deficiency has minimal effects on CD8<sup>+</sup> T cell cytolytic function in melanoma bearing mice.** A and B) RAG<sup>-/-</sup> recipients of CD8<sup>+</sup> T cells from WT and Aire<sup>GW/+</sup> mice were followed for B16 melanoma tumor growth and survival after B16 inoculation; n=10 per group, **Mann Whitney U-test**. \*p<0.05, n.s.=non-significant. C) Absolute numbers of CD8<sup>+</sup> tumor-infiltrating cells. **t-test**. ns=not significant. D) Average cumulative frequencies of Ki67<sup>+</sup>

among CD8<sup>+</sup> T cells. Tumor-infiltrating lymphocytes (TIL) were harvested on Day 19 following B16 melanoma inoculation in RAG<sup>-/-</sup> recipients of CD8<sup>+</sup> T cells from WT and Aire<sup>GW/+</sup> donor mice. **t-test. ns=not significant.** E) Representative flow cytometry histogram comparison and average absolute B16 cell numbers of cell trace violet-labeled B16 cells after co-incubation with non-CD4<sup>+</sup> T cells from WT and Aire<sup>GW/+</sup> mice. **t-test. ns=not significant.**

## Supplementary Figure 2

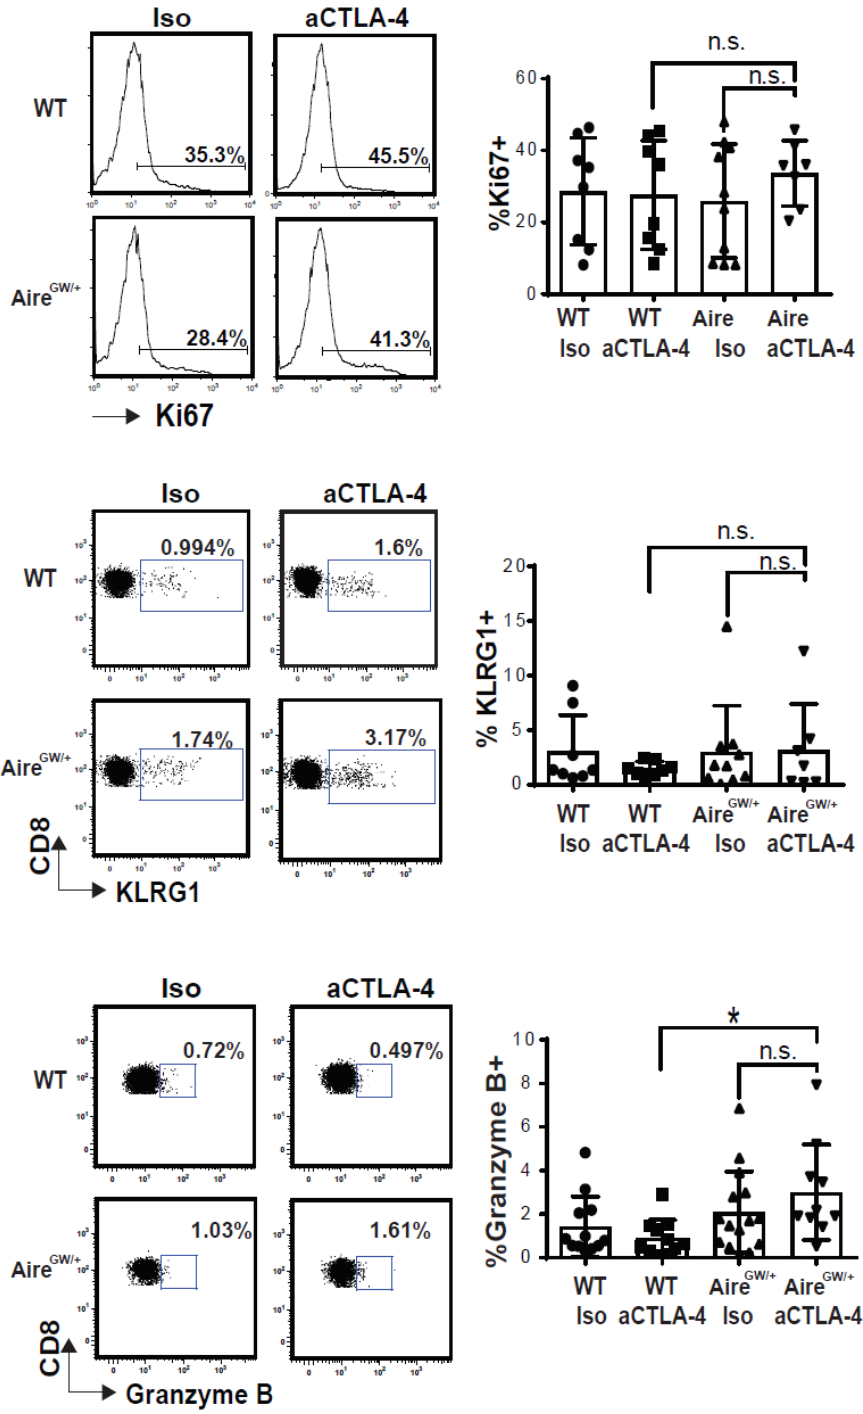

**Supplementary Figure 2: Modest effect of Aire deficiency and anti-CTLA-4 antibody on CD8+ T cell responses.** Tumor-infiltrating lymphocytes (TIL) were harvested on Day 19 following B16 melanoma inoculation in WT and Aire<sup>GW/+</sup> mice treated with aCTLA-4 or iso antibody. Representative flow cytometry plots and average cumulative frequencies of Ki67<sup>+</sup>, KLRG1<sup>+</sup>, and Granzyme B<sup>+</sup> among CD8<sup>+</sup> T cells. n=9-12 in each group. **One-way ANOVA with Tukey's multiple comparisons test.** ns=not significant, \*p<0.05.

### Supplementary Figure 3

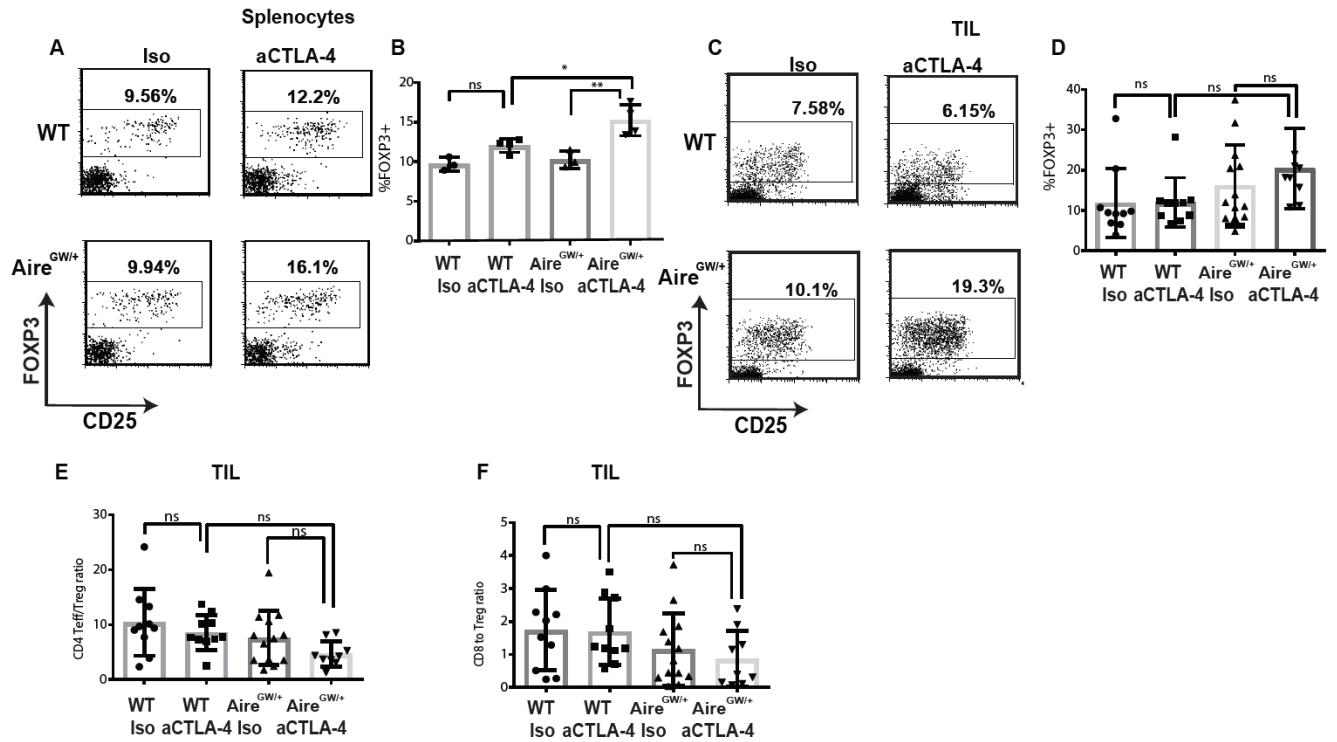

**Supplementary Figure 3: Anti-CTLA-4 antibody treatment in Aire deficient mice does not decrease Treg population.** Splenocytes and tumor-infiltrating lymphocytes (TIL) were harvested on Day 19 following B16 melanoma inoculation in WT and Aire<sup>GW/+</sup> mice treated with anti-CTLA-4 antibody (aCTLA-4) or isotype control antibody (Iso). A) Representative flow cytometry plots of FOXP3 and CD25 expression and (B) average cumulative frequencies of FOXP3<sup>+</sup> Tregs within CD4<sup>+</sup> splenocyte population. C) Representative flow cytometry plots of FOXP3 and CD25 expression and (D) average cumulative frequencies of FOXP3<sup>+</sup> Tregs within CD4<sup>+</sup> TIL population. E and F) Average TIL cumulative ratio of CD4<sup>+</sup> Teffs : FOXP3<sup>+</sup> Tregs (E) and CD8<sup>+</sup> T cells : FOXP3<sup>+</sup> Tregs (F). **One-way ANOVA with Tukey's multiple comparisons test.** \*p<0.05, \*\*p<0.01, n.s= not significant.

## Supplementary Figure 4

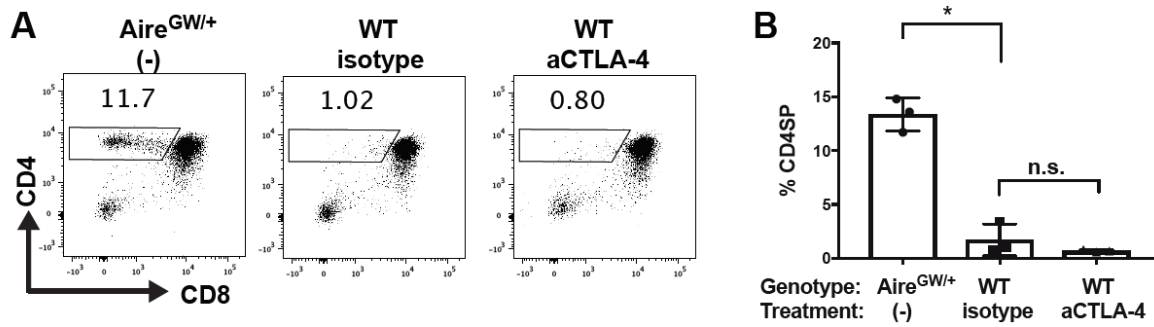

### Supplementary Figure 4: anti-CTLA-4 antibody does not impair negative selection of TRP-1 specific CD4+ T cells.

A) Representative flow cytometric plots of CD4<sup>+</sup> and CD8<sup>+</sup> thymocytes from Aire<sup>GW/+</sup> or WT TRP-1 TCR Tg mice. WT TRP-1 TCR Tg were treated with either isotype control antibody (iso) or anti-CTLA-4 antibody (aCTLA-4). B) Cumulative frequency (mean  $\pm$  SD) of CD4 single positive (SP) cells. **One-way ANOVA with Tukey's multiple comparisons test.**

\* $p < .05$ . n.s.=not significant.

## Supplementary Figure 5

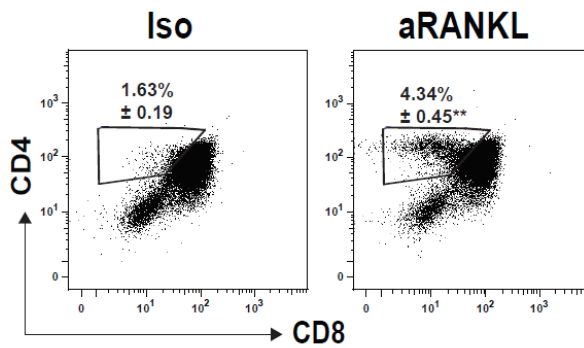

**Supplementary Figure 5: anti-RANKL antibody impairs negative selection of TRP-1 specific CD4<sup>+</sup> single positive T cells.** Representative flow cytometric plots of CD4<sup>+</sup> and CD8<sup>+</sup> thymocytes from TRP-1 TCR Tg mice treated with isotype control antibody (iso) or anti-RANKL antibody (aRANKL). Mean +/- SD shown. **t-test.** \*\*p<.01.

Supplementary Figure 6

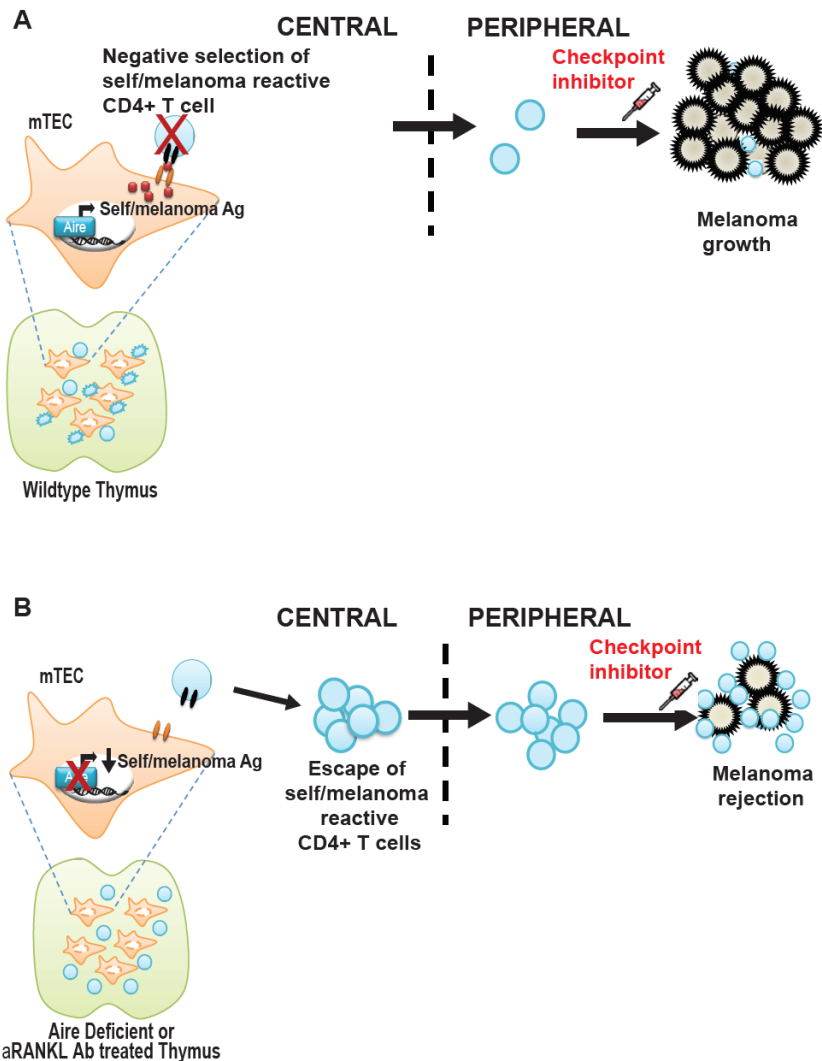

**Supplementary Figure 6: Model of mechanism underlying additive anti-melanoma effects of combination central and peripheral tolerance blockade.** A) In the thymus, Aire in mTECs promotes self/melanoma antigen expression, which results in negative selection of self/melanoma-reactive CD4<sup>+</sup> T cells. As a result, the efficacy of checkpoint inhibition is limited by the scarcity of melanoma-reactive T cells in the periphery. B) Aire deficiency or transient depletion of Aire-expressing mTECs with anti-RANKL (aRANKL) antibody rescues self/melanoma antigen-reactive effector CD4<sup>+</sup> T cells from negative selection. This expansion of the melanoma-reactive T cell pool available for activation by checkpoint inhibitors enhances anti-melanoma immunity.
